# Supplementary material for: Deletion of Cdk5 in Macrophages Ameliorates Anti-Inflammatory Response during Endotoxemia through Induction of C-Maf and Il-10
Source: MDPI journal article supplement (doi:10.3390/ijms22179648), 2021-09-06
Supplement: s1 [file s1]

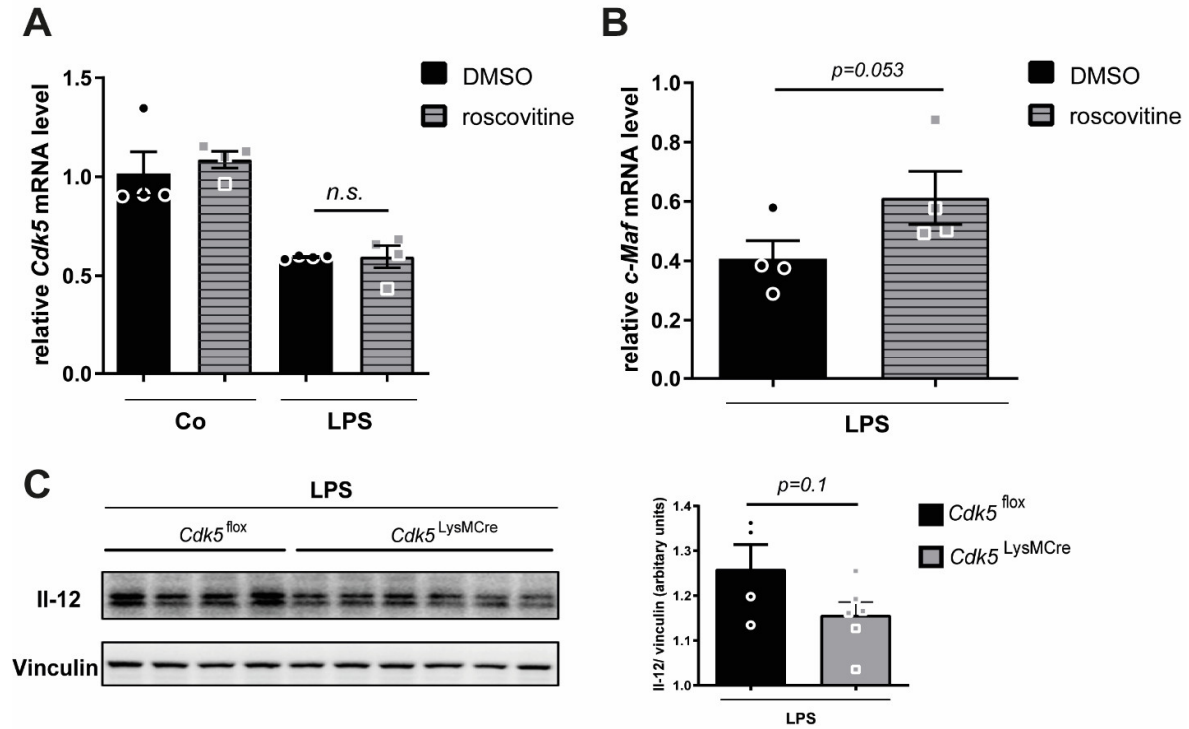

**Supplementary Figure S1:** (A) BMDMs derived from wild-type mice were 30 min pre-treated with 0.16  $\mu$ M roscovitine, the specific concentration for *Cdk5* inhibition or DMSO (vehicle control), and then stimulated 4 h with PBS (Co) or LPS (100 ng/ml) and relative expression of *Cdk5* mRNA was determined by qRT-PCR. (B) BMDMs derived from wild-type mice were 30 min pre-treated with 0.16  $\mu$ M roscovitine or DMSO (vehicle control) and then stimulated 4 h with LPS (100 ng/ml) and relative expression of *c-Maf* mRNA was determined by qRT-PCR. (C) IL-12 (approx. 45kDa) protein and vinculin (117 kDa) as loading control were detected by immunoblot (left) and quantified (right). Results are depicted as mean  $\pm$  SEM. Statistical analysis was performed by (A) a 2-way ANOVA followed by a Bonferroni post hoc test and (B) and (C) by a normality test, followed by a two-tailed unpaired Student's *t* test. n.s. not significant.

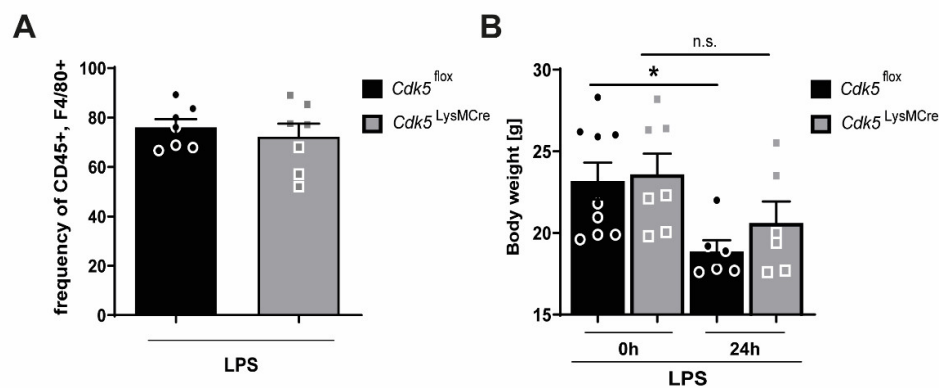

**Supplementary Figure S2:** (A) Flow cytometry analysis for macrophages (CD45<sup>+</sup>, F4/80<sup>+</sup>) from bronchoalveolar lavage (BAL) of *Cdk5*<sup>flox</sup> and *Cdk5*<sup>LysMCre</sup> mice after 24 h of LPS-induced endotoxemia. (B) Body weight of *Cdk5*<sup>flox</sup> and *Cdk5*<sup>LysMCre</sup> mice before and after 24 h of LPS-induced endotoxemia. Results are depicted as mean  $\pm$  SEM. Statistical analysis was performed by a normality test, followed by a two-tailed unpaired Student's *t* test. \*  $p < 0.05$ . n.s. not significant.

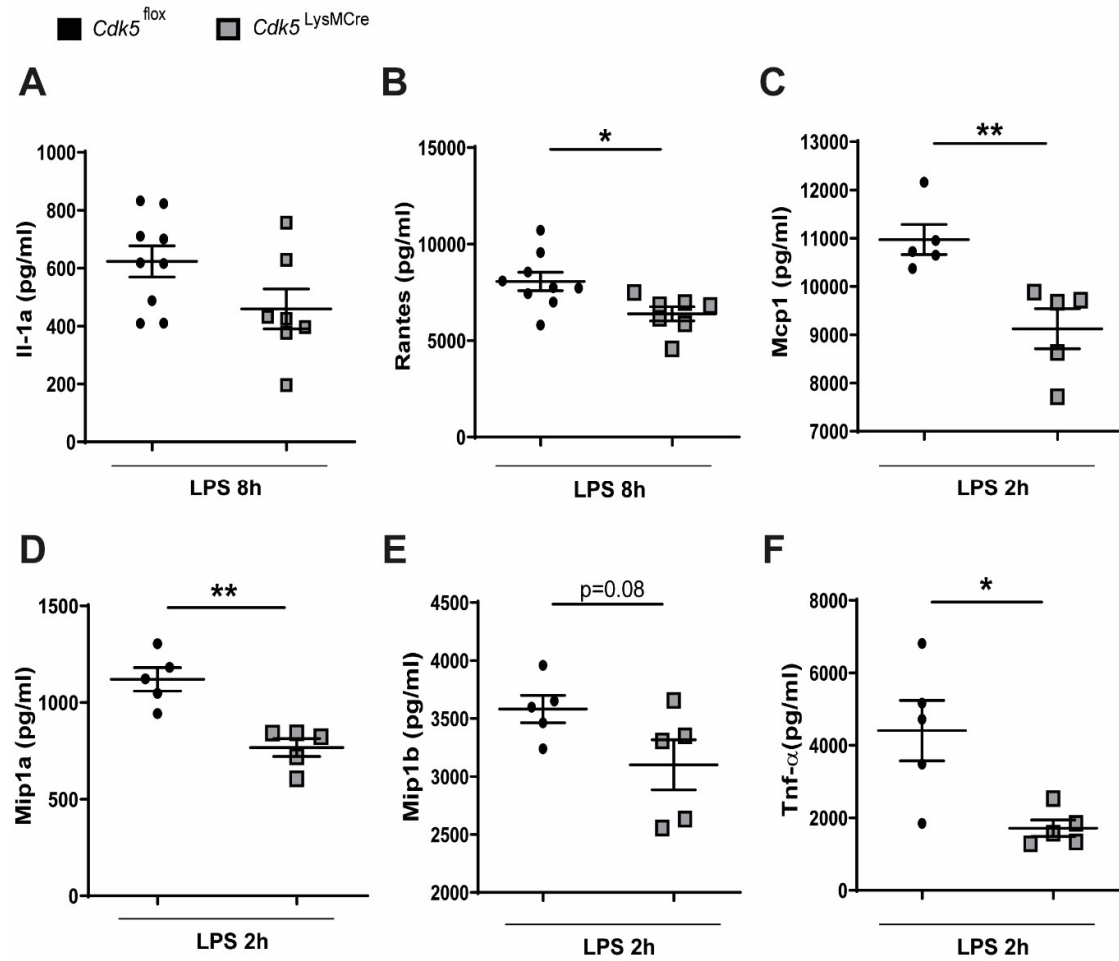

**Supplementary Figure S3:** Concentration of plasma (A) IL-1a (B) Ccl5 (Rantes), (C) Mcp1, (D) Mip1a, (E) Mip1b and (F) TNF-α protein from *Cdk5<sup>fllox</sup>* and *Cdk5<sup>LysMCre</sup>* mice after LPS-induced endotoxemia at the indicated time points analysed with Bio-Plex Pro Mouse Cytokine 23-plex Assay. Results are depicted as mean ± SEM. Statistical analysis was performed by a normality test, followed by a two-tailed unpaired Student's t test. \* p < 0.05; \*\* p < 0.01.

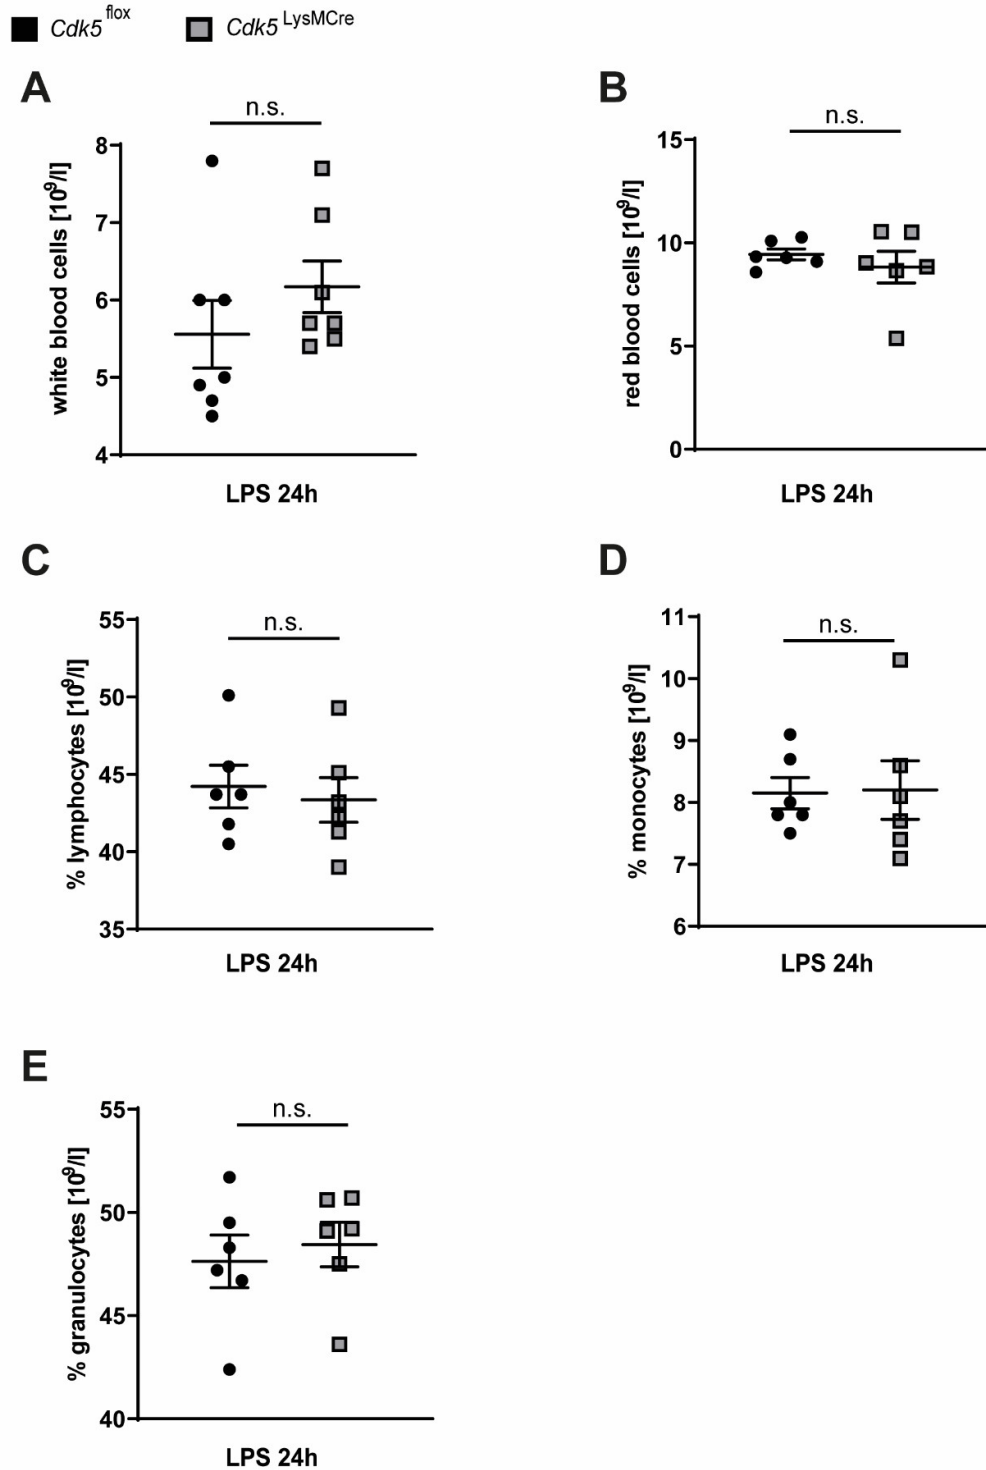

**Supplementary Figure S4:** Analysis of (A) white blood cells, (B) red blood cells, (C) lymphocytes, (D) monocytes and (E) granulocytes in the plasma from *Cdk5<sup>flox</sup>* and *Cdk5<sup>LysMCre</sup>* mice after 24 h LPS-induced endotoxemia were investigated with animal blood counter. Results are depicted as mean  $\pm$  SEM. Statistical analysis was performed by a normality test, followed by a two-tailed unpaired Student's *t* test. n.s. not significant.
